# Supplementary material
Source: Research Square preprint supplement (doi:10.21203/rs.3.rs-9505042/v1)
Supplement: Supplementary file 1 [file 825da555ab1099fa692d2172.docx]

**Supplementary Tables**

*Integrated Management vs Usual Care in Chronic Lung Disease with Post-COVID Syndrome*

Supplementary Table S1 presents expanded baseline characteristics with absolute standardized mean differences (SMDs);

Supplementary Table S2 summarises covariate balance before and after inverse probability of treatment weighting (IPTW);

Supplementary Table S3 reports IPTW sensitivity analyses for the primary and key secondary discharge outcomes.

**Supplementary Table S1. Expanded baseline characteristics with SMDs**

Expanded baseline characteristics, including key physiological, radiological, inflammatory, functional, and patient-reported measures, with absolute standardized mean differences.

| **Variable** | **Integrated management (n = 120)** | **Usual care (n = 240)** | **Absolute SMD** |
| --- | --- | --- | --- |
| **Demographic and clinical characteristics** | | | |
| Age, years | 65.8 ± 10.2 | 65.4 ± 11.5 | 0.040 |
| Sex: Female | 61 (50.8%) | 104 (43.3%) | 0.150 |
| Sex: Male | 59 (49.2%) | 136 (56.7%) | 0.150 |
| Body mass index, kg/m² | 23.6 ± 3.8 | 24.4 ± 3.6 | 0.218 |
| Smoking status: Non-smoker | 71 (59.2%) | 158 (65.8%) | 0.138 |
| Smoking status: Current/former smoker | 49 (40.8%) | 82 (34.2%) | 0.138 |
| OSAHS | 28 (23.3%) | 44 (18.3%) | 0.123 |
| Baseline disease: COPD | 45 (37.5%) | 94 (39.2%) | 0.034 |
| Baseline disease: Asthma | 27 (22.5%) | 51 (21.2%) | 0.030 |
| Baseline disease: Bronchiectasis | 19 (15.8%) | 42 (17.5%) | 0.045 |
| Baseline disease: ILD | 29 (24.2%) | 53 (22.1%) | 0.049 |
| **Baseline physiological, radiological, and patient-reported measures** | | | |
| PaCO₂, mmHg | 42.7 ± 5.8 | 42.2 ± 5.7 | 0.087 |
| PaO₂, mmHg | 76.8 ± 10.0 | 78.4 ± 9.6 | 0.157 |
| FeNO, ppb | 26.9 ± 12.2 | 28.5 ± 12.1 | 0.130 |
| FEV₁% predicted | 69.7 ± 18.4 | 69.4 ± 17.4 | 0.019 |
| FVC% predicted | 74.5 ± 16.6 | 76.3 ± 16.9 | 0.103 |
| VC% predicted | 78.7 ± 16.1 | 80.3 ± 16.0 | 0.104 |
| CT-assessed fibrotic extent, % | 8.9 ± 6.1 | 9.3 ± 5.5 | 0.066 |
| SGRQ total score | 47.5 ± 17.2 | 46.8 ± 17.2 | 0.038 |
| SAS anxiety score | 55.4 ± 9.8 | 56.0 ± 8.7 | 0.069 |
| 15-min walking distance, m | 673.2 ± 143.4 | 687.7 ± 136.2 | 0.104 |
| CRP, mg/L | 8.1 ± 5.1 | 7.6 ± 5.6 | 0.094 |
| ESR, mm/h | 21.4 ± 14.6 | 20.3 ± 13.6 | 0.078 |
| Sleep-quality score | 9.8 ± 3.8 | 10.2 ± 3.8 | 0.105 |

**Note.** Data are presented as mean ± standard deviation or number (percentage), as appropriate. Absolute standardized mean differences (SMDs) are shown to facilitate assessment of baseline imbalance in this non-randomized cohort; values <0.1 are typically considered indicative of acceptable balance, whereas values between 0.1 and 0.2 suggest small residual imbalance.

**Interpretation.** Most displayed baseline imbalances were small. The largest absolute SMDs were observed for body mass index (0.218), PaO₂ (0.157), sex distribution (0.150), and smoking status (0.138), supporting the rationale for adjusted multivariable models and propensity score-based sensitivity analyses.

**Supplementary Table S2. Covariate balance before and after IPTW**

Covariate balance for the prespecified variables displayed in the manuscript, before and after inverse probability of treatment weighting (IPTW).

| **Covariate** | **Unweighted integrated** | **Unweighted usual care** | **Absolute SMD before IPTW** | **Weighted integrated** | **Weighted usual care** | **Absolute SMD after IPTW** |
| --- | --- | --- | --- | --- | --- | --- |
| Age, years | 65.8 | 65.4 | 0.040 | 65.4 | 65.4 | 0.007 |
| Male sex | 49.2% | 56.7% | 0.150 | 54.5% | 53.8% | 0.013 |
| Body mass index, kg/m² | 23.6 | 24.4 | 0.218 | 24.2 | 24.1 | 0.008 |
| Current/former smoker | 40.8% | 34.2% | 0.138 | 36.9% | 36.8% | 0.002 |
| OSAHS | 23.3% | 18.3% | 0.123 | 20.7% | 20.4% | 0.007 |
| Baseline disease: COPD | 37.5% | 39.2% | 0.034 | 40.4% | 38.7% | 0.033 |
| Baseline disease: Asthma | 22.5% | 21.2% | 0.030 | 19.5% | 21.7% | 0.054 |
| Baseline disease: Bronchiectasis | 15.8% | 17.5% | 0.045 | 16.5% | 16.5% | 0.001 |
| Baseline disease: ILD | 24.2% | 22.1% | 0.049 | 23.6% | 23.0% | 0.013 |
| PaCO₂, mmHg | 42.7 | 42.2 | 0.087 | 42.5 | 42.3 | 0.029 |
| FEV₁% predicted | 69.7 | 69.4 | 0.019 | 70.2 | 69.6 | 0.035 |
| CT-assessed fibrotic extent, % | 8.9 | 9.3 | 0.066 | 9.3 | 9.1 | 0.029 |
| SGRQ total score | 47.5 | 46.8 | 0.038 | 47.8 | 47.3 | 0.027 |
| SAS anxiety score | 55.4 | 56.0 | 0.069 | 56.1 | 55.8 | 0.034 |
| 15-min walking distance, m | 673.2 | 687.7 | 0.104 | 685.0 | 682.4 | 0.019 |
| CRP, mg/L | 8.1 | 7.6 | 0.094 | 7.8 | 7.8 | 0.004 |
| ESR, mm/h | 21.4 | 20.3 | 0.078 | 20.7 | 20.6 | 0.011 |
| Sleep-quality score | 9.8 | 10.2 | 0.105 | 10.2 | 10.1 | 0.013 |

**Note.** IPTW was based on the propensity score for receiving integrated management. Weighted columns display IPTW-adjusted means or proportions. Absolute SMDs after weighting <0.1 indicate good covariate balance.

**Interpretation.** After IPTW, all displayed covariates achieved absolute SMDs below 0.1, indicating substantially improved between-group balance and supporting the use of IPTW as a robustness analysis for the non-randomized design.

**Supplementary Table S3. IPTW sensitivity analysis for primary and key secondary outcomes**

Sensitivity analyses using inverse probability of treatment weighting for the primary and key secondary discharge outcomes.

| **Outcome** | **IPTW-adjusted mean difference (integrated vs usual care)** | **95% CI** | **P value** |
| --- | --- | --- | --- |
| PaCO₂, mmHg | -0.99 | -1.22 to -0.75 | <0.001 |
| FEV₁% predicted | 2.19 | 1.32 to 3.06 | <0.001 |
| CT-assessed fibrotic extent, % | -0.57 | -0.92 to -0.22 | 0.001 |
| SGRQ total score | -3.95 | -5.18 to -2.71 | <0.001 |
| SAS anxiety score | -2.51 | -3.19 to -1.84 | <0.001 |
| 15-min walking distance, m | 34.01 | 25.65 to 42.37 | <0.001 |
| CRP, mg/L | -1.01 | -1.43 to -0.59 | <0.001 |
| ESR, mm/h | -1.38 | -2.14 to -0.62 | <0.001 |
| Sleep-quality score | -0.72 | -1.04 to -0.40 | <0.001 |

**Note.** Effect estimates are IPTW-adjusted between-group differences in change from baseline to discharge, expressed as integrated management minus usual care. Negative values favour integrated management for PaCO₂, CT-assessed fibrotic extent, SGRQ, SAS, CRP, ESR, and sleep-quality score, whereas positive values favour integrated management for FEV₁% predicted and 15-min walking distance.

**Interpretation.** The IPTW sensitivity analysis showed directionally consistent and statistically significant associations across all displayed outcomes, broadly supporting the robustness of the main adjusted findings to measured baseline imbalance.
